# Supplementary material for: A Swiss Health Care Professionals’ Perspective on the Meaning of Interprofessional Collaboration in Health Care of People with MS—A Focus Group Study
Source: MDPI journal article supplement (doi:10.3390/ijerph18126537), 2021-06-17
Supplement: s1 [file s1]

Figure S2: Extract from MAXQDA Coding

Zusammenarbeit einzelner Berufsgruppen

9 Codings aus 3 Dokumenten

Beenden

Codesystem

350

Sozialdemographie

14

Multiple Sklerose

1

MS\_Weiterbildungen\_spezifisch

1

MS\_stationär

2

MS\_Ethische Fragen

23

MS\_Patientenrolle\_Beziehungen\_Umgang mit MS

64

MS\_Therapieangebot

12

IPZ

0

Zusammenarbeit einzelner Berufsgruppen

9

IPZ\_Wichtigkeit\_Vorstellungen von IPZ

16

IPZ\_stationär\_Struktur

37

IPZ\_in Grundausbildung\_Weiterbildung\_Veränderung...

13

IPZ\_Arbeitsaufteilung/Absprachen/Sichtweisen/Rolle...

42

IPZ\_ambulant\_Struktur\_Therapie

26

IPZ\_ambulant\_Struktur\_Arzt\_Koppelung

9

IPZ\_aus Patientensicht

7

IPZ\_Voraussetzung Raum & Zeit & materiell (digital)

33

IPZ\_Patient ist Teil davon

9

IPZ\_Anforderung/Voraussetzungen (Therapeut/Bewe...

27

IPZ\_Monotherapie\_Bewusstsein

4

IPZ\_ALS\_MS\_Vorreiter

1

| Dokument              | Codings                                                                                                                                                                                                                                                        | Codes | Kommentar |
|-----------------------|----------------------------------------------------------------------------------------------------------------------------------------------------------------------------------------------------------------------------------------------------------------|-------|-----------|
| Transkription_FG03... | Also ich meine, wir haben eigentlich grundsätzlich eine interdisziplinäre Zusammenarbeit, aber wir von der Logo (=Logopädie) sind sehr selten bei den MS-Patienten involviert, weil es meistens gerade nicht so im Vordergrund steht, wenn sie hier akut sind. |       |           |
| Transkription_FG02... | Ich denke als Ergo, wir arbeiten nach dem ICF Konzept und wir sind dann für die Freizeit, die tägliche Routine und den Oberkörper zuständig.                                                                                                                   |       |           |
| Transkription_FG02... | PRPP, das ist ein typisches Ergotherapeutisches Konzept wo es um den Bewegungs- und Planungsablauf geht. Das man das auch vorbereitet und in kleinen Aspekten üben kann um nachher Alltagsaufgaben vollständig erfüllen zu können.                             |       |           |
| Transkription_FG01... | Also vor allem jetzt hier in der REHAB merke ich, ich habe eine relativ enge Zusammenarbeit mit der Ergotherapie bezüglich MS Patienten                                                                                                                        |       |           |
| Transkription_FG01... | Mit der Logopädie ist es weniger, also weniger Austausch, da aber ich denke dies ist vielleicht weil sich die spezifischen Aufträge weniger überschneiden die man zusammen hat                                                                                 |       |           |
| Transkription_FG01... | Mit der Ergotherapie hat man oft Hilfsmittel die sich überschneiden, oder Transfers die man zusammen erarbeitet. Es gibt viel Überschneidungen zwischen diesen zwei Berufen, dass man dadurch auch relativ eng zusammenarbeitet.                               |       |           |
| Transkription_FG01... | Ich arbeite hier in der Tagesklinik, es ist teilstationär und wir sind ein sehr kleines Team mit 1-2 Ergotherapeuten und 3 Physiotherapeuten und durch das kann man sich auch sehr eng austauschen.                                                            |       |           |
| Transkription_FG01... | Gut aber ich habe sowieso, also ich habe auch prinzipiell viel mehr zu tun mit der Physiotherapie wie mit der Logopädie.                                                                                                                                       |       |           |
| Transkription_FG01... | Also ich habe viel mehr eben mit der Physiotherapie zu tun. Da gibt es viel mehr Überschneidungen habe ich das Gefühl.                                                                                                                                         |       |           |
