# Supplementary figures and images for: A Swiss Health Care Professionals’ Perspective on the Meaning of Interprofessional Collaboration in Health Care of People with MS—A Focus Group Study
Source: MDPI journal article supplement (doi:10.3390/ijerph18126537), 2021-06-17

Figure S2: MAXQDA Main Sets

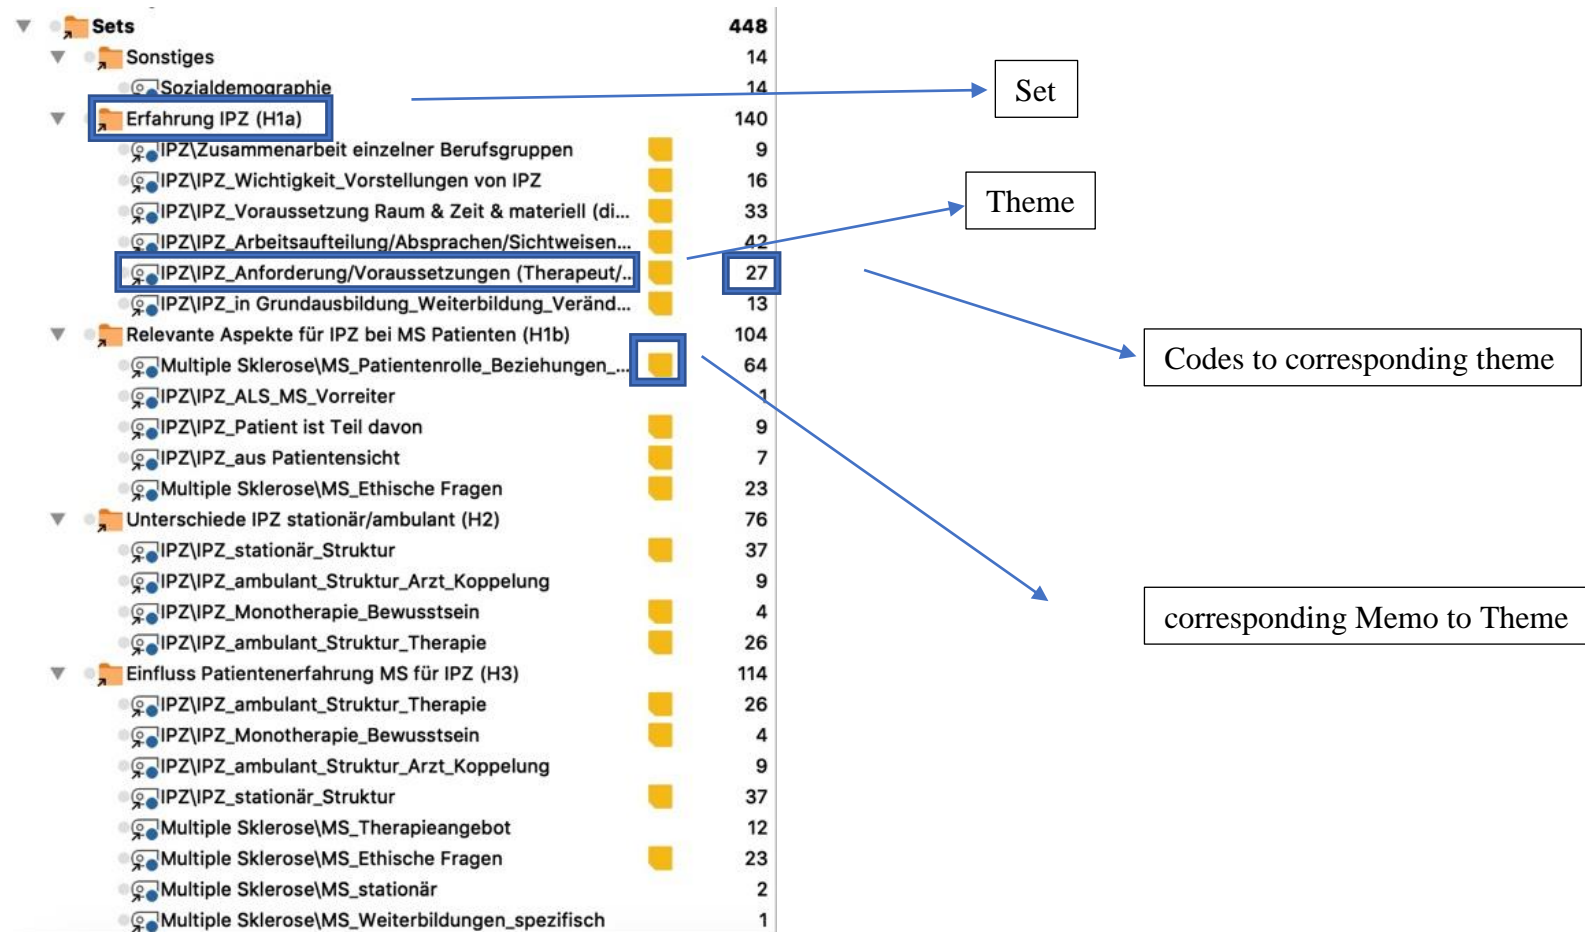

Supplement: s1 [file s1]
